# Supplementary material for: Challenge Level Contributes to the Efficacy of Treadmill Interventions after Stroke: A Systematic Review and Meta-Analysis
Source: MDPI journal article supplement (doi:10.3390/brainsci13121729), 2023-12-18
Supplement: s1 [file s1]

# Meta-analysis: Dose-response relationship in Treadmill Training

Usman Rashid

09/09/2023

## Contents

|          |                                  |          |
|----------|----------------------------------|----------|
| <b>1</b> | <b>Results</b>                   | <b>2</b> |
| 1.1      | Treadmill vs Other . . . . .     | 2        |
| 1.1.1    | Walking Endurance . . . . .      | 2        |
| 1.1.1.1  | Intensity . . . . .              | 2        |
| 1.1.1.2  | Amount . . . . .                 | 4        |
| 1.1.1.3  | Dosage . . . . .                 | 6        |
| 1.1.2    | Walking Speed . . . . .          | 7        |
| 1.1.2.1  | Intensity . . . . .              | 7        |
| 1.1.2.2  | Amount . . . . .                 | 9        |
| 1.1.2.3  | Dosage . . . . .                 | 11       |
| 1.2      | Treadmill vs Treadmill . . . . . | 12       |
| 1.2.1    | Walking Endurance . . . . .      | 12       |
| 1.2.1.1  | Intensity . . . . .              | 12       |
| 1.2.1.2  | Amount . . . . .                 | 14       |
| 1.2.1.3  | Dosage . . . . .                 | 15       |
| 1.2.2    | Walking Speed . . . . .          | 16       |
| 1.2.2.1  | Intensity . . . . .              | 16       |
| 1.2.2.2  | Amount . . . . .                 | 18       |
| 1.2.2.3  | Dosage . . . . .                 | 19       |

# 1 Results

## 1.1 Treadmill vs Other

### 1.1.1 Walking Endurance

#### 1.1.1.1 Intensity

|                   | SMD     | 95%-CI            | %W(random) | Intensity         |
|-------------------|---------|-------------------|------------|-------------------|
| Aguiar 2020       | 0.6923  | [-0.1731; 1.5577] | 6.0        | LOW:HIGH          |
| Brauer 2022       | 0.1479  | [-0.2299; 0.5257] | 10.1       | LOW:MODERATE      |
| Combs-Miller 2014 | -0.0884 | [-0.9654; 0.7887] | 5.9        | MODERATE:MODERATE |
| Gama 2017         | 0.0273  | [-0.8085; 0.8631] | 6.2        | LOW:LOW           |
| Hornby 2019i      | 1.0296  | [ 0.4975; 1.5616] | 8.7        | LOW:HIGH          |
| Hornby 2019ii     | 0.9491  | [ 0.4124; 1.4857] | 8.6        | LOW:HIGH          |
| Kang 2012i        | 0.1116  | [-0.7657; 0.9890] | 5.9        | LOW:MODERATE      |
| Kang 2012ii       | 1.0323  | [ 0.0867; 1.9778] | 5.4        | LOW:MODERATE      |
| MacKay-Lyons 2013 | 0.6377  | [ 0.0372; 1.2382] | 8.1        | LOW:MODERATE      |
| Macko 2005        | 1.5392  | [ 0.8639; 2.2145] | 7.4        | LOW:HIGH          |
| Nave 2019         | 0.1880  | [-0.1237; 0.4996] | 10.6       | LOW:MODERATE      |
| Park 2013i        | -0.2891 | [-1.1712; 0.5930] | 5.9        | LOW:LOW           |
| Park 2013ii       | 0.0852  | [-0.7918; 0.9622] | 5.9        | LOW:LOW           |
| Park 2015         | 0.9514  | [-0.0104; 1.9131] | 5.3        | LOW:LOW           |

Number of studies: k = 14

Number of observations: o = 642

|                      | SMD    | 95%-CI           | t    | p-value |
|----------------------|--------|------------------|------|---------|
| Random effects model | 0.5118 | [0.2036; 0.8199] | 3.59 | 0.0033  |

Quantifying heterogeneity:

$\tau^2 = 0.1929$  [0.0277; 0.6167];  $\tau = 0.4392$  [0.1664; 0.7853]

$I^2 = 60.1\%$  [28.3%; 77.8%];  $H = 1.58$  [1.18; 2.12]

Quantifying residual heterogeneity:

$\tau^2 = 0.1115$ ;  $\tau = 0.3339$ ;  $I^2 = 11.1\%$  [0.0%; 51.3%];  $H = 1.06$  [1.00; 1.43]

Test of heterogeneity:

Q d.f. p-value

32.58 13 0.0020

Results for subgroups (random effects model):

|                               | k     | SMD     | 95%-CI            | $\tau^2$ | $\tau$ | Q    |
|-------------------------------|-------|---------|-------------------|----------|--------|------|
| Intensity = LOW:LOW           | 4     | 0.1698  | [-0.6468; 0.9864] | 0.1115   | 0.3339 | 3.72 |
| Intensity = MODERATE:MODERATE | 1     | -0.0884 | [-1.1827; 1.0059] | 0.1115   | 0.3339 | 0.00 |
| Intensity = LOW:MODERATE      | 5     | 0.3530  | [-0.0773; 0.7833] | 0.1115   | 0.3339 | 4.73 |
| Intensity = LOW:HIGH          | 4     | 1.0667  | [ 0.5401; 1.5933] | 0.1115   | 0.3339 | 2.80 |
| $I^2$                         |       |         |                   |          |        |      |
| Intensity = LOW:LOW           | 19.4% |         |                   |          |        |      |
| Intensity = MODERATE:MODERATE | --    |         |                   |          |        |      |
| Intensity = LOW:MODERATE      | 15.4% |         |                   |          |        |      |
| Intensity = LOW:HIGH          | 0.0%  |         |                   |          |        |      |

Test for subgroup differences (random effects model):

|                | Q     | d.f. | p-value |
|----------------|-------|------|---------|
| Between groups | 14.78 | 3    | 0.0020  |
| Within groups  | 11.25 | 10   | 0.3381  |

Details on meta-analytical method:

- Inverse variance method
- Sidik-Jonkman estimator for  $\tau^2$   
(assuming common  $\tau^2$  in subgroups)
- Q-Profile method for confidence interval of  $\tau^2$  and  $\tau$
- Hartung-Knapp adjustment for random effects model (df = 13)
- Hedges' g (bias corrected standardised mean difference; using exact formulae)

## 1.1.1.2 Amount

Warning: Redundant predictors dropped from the model.

|                   | SMD     | 95%-CI            | %W(random) | amount.mins.delta.f |
|-------------------|---------|-------------------|------------|---------------------|
| Aguiar 2020       | 0.6923  | [-0.1731; 1.5577] | 6.0        | Equal               |
| Brauer 2022       | 0.1479  | [-0.2299; 0.5257] | 10.1       | Equal               |
| Combs-Miller 2014 | -0.0884 | [-0.9654; 0.7887] | 5.9        | Equal               |
| Gama 2017         | 0.0273  | [-0.8085; 0.8631] | 6.2        | Equal               |
| Hornby 2019i      | 1.0296  | [ 0.4975; 1.5616] | 8.7        | Lower               |
| Hornby 2019ii     | 0.9491  | [ 0.4124; 1.4857] | 8.6        | Lower               |
| Kang 2012i        | 0.1116  | [-0.7657; 0.9890] | 5.9        | Equal               |
| Kang 2012ii       | 1.0323  | [ 0.0867; 1.9778] | 5.4        | Equal               |
| MacKay-Lyons 2013 | 0.6377  | [ 0.0372; 1.2382] | 8.1        | Equal               |
| Macko 2005        | 1.5392  | [ 0.8639; 2.2145] | 7.4        | Equal               |
| Nave 2019         | 0.1880  | [-0.1237; 0.4996] | 10.6       | Equal               |
| Park 2013i        | -0.2891 | [-1.1712; 0.5930] | 5.9        | Equal               |
| Park 2013ii       | 0.0852  | [-0.7918; 0.9622] | 5.9        | Equal               |
| Park 2015         | 0.9514  | [-0.0104; 1.9131] | 5.3        | Equal               |

Number of studies: k = 14

Number of observations: o = 642

|                      | SMD    | 95%-CI           | t    | p-value |
|----------------------|--------|------------------|------|---------|
| Random effects model | 0.5118 | [0.2036; 0.8199] | 3.59 | 0.0033  |

Quantifying heterogeneity:

$\tau^2 = 0.1929$  [0.0277; 0.6167];  $\tau = 0.4392$  [0.1664; 0.7853]

$I^2 = 60.1\%$  [28.3%; 77.8%];  $H = 1.58$  [1.18; 2.12]

Quantifying residual heterogeneity:

$\tau^2 = 0.1729$ ;  $\tau = 0.4158$ ;  $I^2 = 48.4\%$  [2.0%; 72.8%];  $H = 1.39$  [1.01; 1.92]

Test of heterogeneity:

Q d.f. p-value  
32.58 13 0.0020

Results for subgroups (random effects model):

|                             | k     | SMD    | 95%-CI           | $\tau^2$ | $\tau$ | Q     |
|-----------------------------|-------|--------|------------------|----------|--------|-------|
| amount.mins.delta.f = Lower | 2     | 0.9894 | [0.4781; 1.5007] | 0.1729   | 0.4158 | 0.04  |
| amount.mins.delta.f = Equal | 12    | 0.4106 | [0.0719; 0.7492] | 0.1729   | 0.4158 | 23.21 |
|                             | $I^2$ |        |                  |          |        |       |
| amount.mins.delta.f = Lower | 0.0%  |        |                  |          |        |       |
| amount.mins.delta.f = Equal | 52.6% |        |                  |          |        |       |

Test for subgroup differences (random effects model):

|                | Q     | d.f. | p-value |
|----------------|-------|------|---------|
| Between groups | 13.25 | 1    | 0.0003  |
| Within groups  | 23.25 | 12   | 0.0257  |

Details on meta-analytical method:

- Inverse variance method
- Sidik-Jonkman estimator for  $\tau^2$   
(assuming common  $\tau^2$  in subgroups)

- Q-Profile method for confidence interval of  $\tau^2$  and  $\tau$
- Hartung-Knapp adjustment for random effects model ( $df = 13$ )
- Hedges'  $g$  (bias corrected standardised mean difference; using exact formulae)

## 1.1.1.3 Dosage

```
##
## Mixed-Effects Model (k = 14; tau^2 estimator: SJ)
##
## tau^2 (estimated amount of residual heterogeneity):      0.1070 (SE = 0.0668)
## tau (square root of estimated tau^2 value):            0.3271
## I^2 (residual heterogeneity / unaccounted variability): 52.26%
## H^2 (unaccounted variability / sampling variability):    2.09
## R^2 (amount of heterogeneity accounted for):            44.53%
##
## Test for Residual Heterogeneity:
## QE(df = 12) = 16.0665, p-val = 0.1882
##
## Test of Moderators (coefficient 2):
## F(df1 = 1, df2 = 12) = 11.9581, p-val = 0.0047
##
## Model Results:
##
##      estimate      se    tval  df    pval   ci.lb   ci.ub
## intrcpt    0.1906  0.1392  1.3690  12  0.1961  -0.1127  0.4938
## Dosage     0.0131  0.0038  3.4580  12  0.0047   0.0049  0.0214  **
##
## ---
## Signif. codes:  0 '***' 0.001 '**' 0.01 '*' 0.05 '.' 0.1 ' ' 1
```

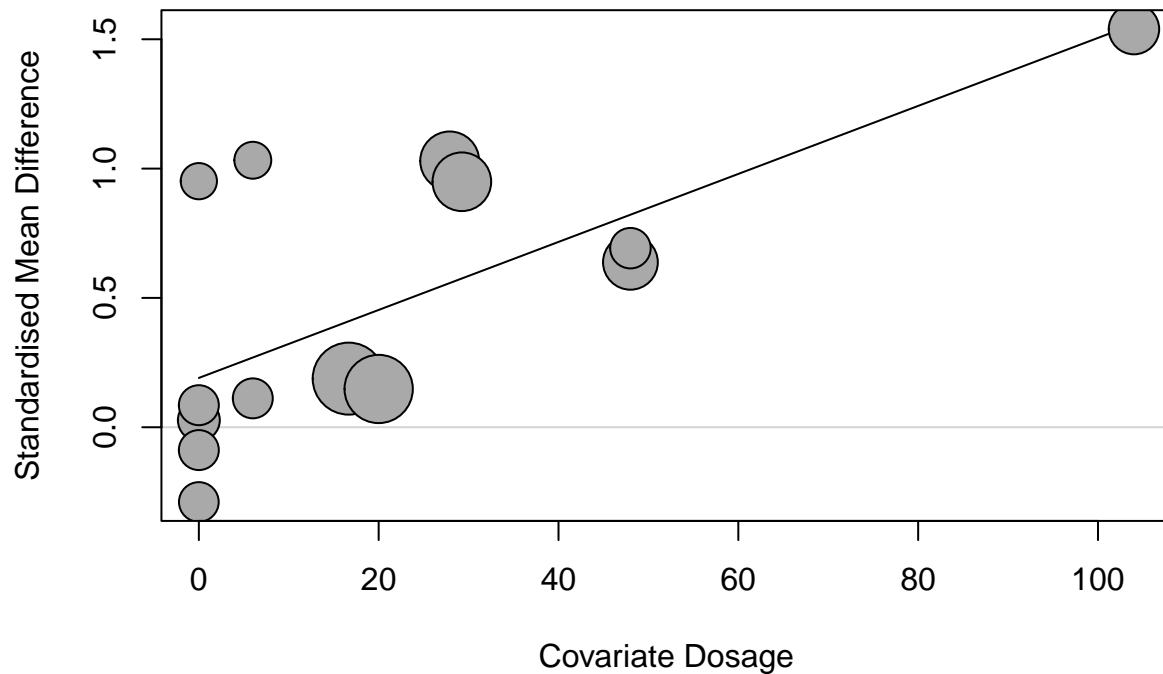

## 1.1.2 Walking Speed

## 1.1.2.1 Intensity

Warning in metacont(Exp.post.n, Exp.post.minus.pre.mean.sel,  
Exp.post.minus.pre.sd.sel, : Note, studies with non-positive values for sd.e or  
sd.c get no weight in meta-analysis.

|                   | SMD     | 95%-CI            | %W(random) | Intensity         |
|-------------------|---------|-------------------|------------|-------------------|
| Aguiar 2020       | -0.3501 | [-1.1935; 0.4933] | 5.8        | LOW:HIGH          |
| Brauer 2022       | 0.1931  | [-0.1851; 0.5712] | 10.6       | LOW:MODERATE      |
| Combs-Miller 2014 | -0.2282 | [-1.1082; 0.6518] | 5.5        | MODERATE:MODERATE |
| Eich 2004         | 0.9756  | [ 0.3867; 1.5646] | 8.2        | LOW:HIGH          |
| Gama 2017         | -0.0314 | [-0.7723; 0.7094] | 6.6        | LOW:LOW           |
| Kang 2012i        | 0.0000  | [-0.8765; 0.8765] | 5.5        | LOW:MODERATE      |
| Kang 2012iii      | 1.2113  | [ 0.2410; 2.1817] | 4.9        | LOW:MODERATE      |
| Kim & Yim 2017    | 0.7699  | [ 0.0113; 1.5286] | 6.5        | LOW:LOW           |
| Laufer 2001       | 0.3926  | [-0.4009; 1.1860] | 6.2        | LOW:LOW           |
| MacKay-Lyons 2013 | 0.3830  | [-0.2073; 0.9733] | 8.1        | LOW:MODERATE      |
| Nave 2019         | 0.2013  | [-0.0984; 0.5010] | 11.5       | LOW:MODERATE      |
| Park 2013i        | NA      |                   | 0.0        | LOW:LOW           |
| Park 2013iii      | 0.0000  | [-0.8765; 0.8765] | 5.5        | LOW:LOW           |
| Pohl 2002         | 1.0978  | [ 0.4285; 1.7671] | 7.3        | LOW:HIGH          |
| Pohl 2002         | 0.4060  | [-0.2208; 1.0328] | 7.8        | LOW:HIGH          |

Number of studies: k = 14

Number of observations: o = 659

|                      | SMD    | 95%-CI           | t    | p-value |
|----------------------|--------|------------------|------|---------|
| Random effects model | 0.3647 | [0.0996; 0.6298] | 2.97 | 0.0108  |

Quantifying heterogeneity:

$\tau^2 = 0.1394$  [0.0000; 0.4592];  $\tau = 0.3734$  [0.0000; 0.6776]

$I^2 = 39.5\%$  [0.0%; 67.9%];  $H = 1.29$  [1.00; 1.76]

Quantifying residual heterogeneity:

$\tau^2 = 0.1495$ ;  $\tau = 0.3866$ ;  $I^2 = 37.8\%$  [0.0%; 69.4%];  $H = 1.27$  [1.00; 1.81]

Test of heterogeneity:

Q d.f. p-value  
21.50 13 0.0636

Results for subgroups (random effects model):

|                               | k     | SMD     | 95%-CI            | $\tau^2$ | $\tau$ | Q    |
|-------------------------------|-------|---------|-------------------|----------|--------|------|
| Intensity = LOW:LOW           | 4     | 0.2901  | [-0.3166; 0.8968] | 0.1495   | 0.3866 | 2.74 |
| Intensity = MODERATE:MODERATE | 1     | -0.2282 | [-1.3895; 0.9331] | 0.1495   | 0.3866 | 0.00 |
| Intensity = LOW:MODERATE      | 5     | 0.3315  | [-0.1497; 0.8128] | 0.1495   | 0.3866 | 4.46 |
| Intensity = LOW:HIGH          | 4     | 0.5885  | [-0.4063; 1.5832] | 0.1495   | 0.3866 | 8.87 |
|                               | $I^2$ |         |                   |          |        |      |
| Intensity = LOW:LOW           | 0.0%  |         |                   |          |        |      |
| Intensity = MODERATE:MODERATE | --    |         |                   |          |        |      |
| Intensity = LOW:MODERATE      | 10.4% |         |                   |          |        |      |
| Intensity = LOW:HIGH          | 66.2% |         |                   |          |        |      |

Test for subgroup differences (random effects model):

|                | Q     | d.f. | p-value |
|----------------|-------|------|---------|
| Between groups | 1.62  | 3    | 0.6560  |
| Within groups  | 16.08 | 10   | 0.0973  |

Details on meta-analytical method:

- Inverse variance method
- Sidik-Jonkman estimator for  $\tau^2$   
(assuming common  $\tau^2$  in subgroups)
- Q-Profile method for confidence interval of  $\tau^2$  and  $\tau$
- Hartung-Knapp adjustment for random effects model (df = 13)
- Hedges' g (bias corrected standardised mean difference; using exact formulae)



## 1.1.2.2 Amount

|                   | SMD     | 95%-CI            | %W(random) | amount.mins.delta.f |
|-------------------|---------|-------------------|------------|---------------------|
| Aguiar 2020       | -0.3501 | [-1.1935; 0.4933] | 5.8        | Equal               |
| Brauer 2022       | 0.1931  | [-0.1851; 0.5712] | 10.6       | Equal               |
| Combs-Miller 2014 | -0.2282 | [-1.1082; 0.6518] | 5.5        | Equal               |
| Eich 2004         | 0.9756  | [ 0.3867; 1.5646] | 8.2        | Equal               |
| Gama 2017         | -0.0314 | [-0.7723; 0.7094] | 6.6        | Equal               |
| Kang 2012i        | 0.0000  | [-0.8765; 0.8765] | 5.5        | Equal               |
| Kang 2012iii      | 1.2113  | [ 0.2410; 2.1817] | 4.9        | Equal               |
| Kim & Yim 2017    | 0.7699  | [ 0.0113; 1.5286] | 6.5        | Higher              |
| Laufer 2001       | 0.3926  | [-0.4009; 1.1860] | 6.2        | Equal               |
| MacKay-Lyons 2013 | 0.3830  | [-0.2073; 0.9733] | 8.1        | Equal               |
| Nave 2019         | 0.2013  | [-0.0984; 0.5010] | 11.5       | Equal               |
| Park 2013i        | NA      |                   | 0.0        | Equal               |
| Park 2013iii      | 0.0000  | [-0.8765; 0.8765] | 5.5        | Equal               |
| Pohl 2002         | 1.0978  | [ 0.4285; 1.7671] | 7.3        | Lower               |
| Pohl 2002         | 0.4060  | [-0.2208; 1.0328] | 7.8        | Lower               |

Number of studies: k = 14

Number of observations: o = 659

|                      | SMD    | 95%-CI           | t    | p-value |
|----------------------|--------|------------------|------|---------|
| Random effects model | 0.3647 | [0.0996; 0.6298] | 2.97 | 0.0108  |

Quantifying heterogeneity:

$\tau^2 = 0.1394$  [0.0000; 0.4592];  $\tau = 0.3734$  [0.0000; 0.6776]

$I^2 = 39.5\%$  [0.0%; 67.9%];  $H = 1.29$  [1.00; 1.76]

Quantifying residual heterogeneity:

$\tau^2 = 0.1307$ ;  $\tau = 0.3616$ ;  $I^2 = 33.5\%$  [0.0%; 66.5%];  $H = 1.23$  [1.00; 1.73]

Test of heterogeneity:

| Q     | d.f. | p-value |
|-------|------|---------|
| 21.50 | 13   | 0.0636  |

Results for subgroups (random effects model):

|                              | k     | SMD    | 95%-CI            | $\tau^2$ | $\tau$ | Q     |
|------------------------------|-------|--------|-------------------|----------|--------|-------|
| amount.mins.delta.f = Lower  | 2     | 0.7416 | [-3.6513; 5.1345] | 0.1307   | 0.3616 | 2.19  |
| amount.mins.delta.f = Equal  | 11    | 0.2590 | [-0.0342; 0.5522] | 0.1307   | 0.3616 | 14.37 |
| amount.mins.delta.f = Higher | 1     | 0.7699 | [-0.2682; 1.8081] | 0.1307   | 0.3616 | 0.00  |
|                              | $I^2$ |        |                   |          |        |       |
| amount.mins.delta.f = Lower  | 54.3% |        |                   |          |        |       |
| amount.mins.delta.f = Equal  | 30.4% |        |                   |          |        |       |
| amount.mins.delta.f = Higher | --    |        |                   |          |        |       |

Test for subgroup differences (random effects model):

|                | Q     | d.f. | p-value |
|----------------|-------|------|---------|
| Between groups | 2.39  | 2    | 0.3033  |
| Within groups  | 16.55 | 11   | 0.1219  |

Details on meta-analytical method:

- Inverse variance method
- Sidik-Jonkman estimator for  $\tau^2$

- (assuming common  $\tau^2$  in subgroups)
- Q-Profile method for confidence interval of  $\tau^2$  and  $\tau$
  - Hartung-Knapp adjustment for random effects model (df = 13)
  - Hedges' g (bias corrected standardised mean difference; using exact formulae)

## 1.1.2.3 Dosage

Warning: 1 study with NAs omitted from model fitting.

Mixed-Effects Model (k = 14; tau<sup>2</sup> estimator: SJ)

tau<sup>2</sup> (estimated amount of residual heterogeneity): 0.1436 (SE = 0.0707)  
 tau (square root of estimated tau<sup>2</sup> value): 0.3789  
 I<sup>2</sup> (residual heterogeneity / unaccounted variability): 59.73%  
 H<sup>2</sup> (unaccounted variability / sampling variability): 2.48  
 R<sup>2</sup> (amount of heterogeneity accounted for): 0.00%

Test for Residual Heterogeneity:

QE(df = 12) = 19.3736, p-val = 0.0799

Test of Moderators (coefficient 2):

F(df1 = 1, df2 = 12) = 0.7110, p-val = 0.4156

Model Results:

|         | estimate | se     | tval   | df | pval   | ci.lb   | ci.ub  |
|---------|----------|--------|--------|----|--------|---------|--------|
| intrcpt | 0.2544   | 0.1804 | 1.4099 | 12 | 0.1840 | -0.1387 | 0.6475 |
| Dosage  | 0.0055   | 0.0065 | 0.8432 | 12 | 0.4156 | -0.0087 | 0.0197 |

---

Signif. codes: 0 '\*\*\*' 0.001 '\*\*' 0.01 '\*' 0.05 '.' 0.1 ' ' 1

## 1.2 Treadmill vs Treadmill

### 1.2.1 Walking Endurance

#### 1.2.1.1 Intensity

|                 | SMD     | 95%-CI            | %W(random) | Intensity         |
|-----------------|---------|-------------------|------------|-------------------|
| Ada 2013        | 0.5730  | [ 0.0837; 1.0622] | 14.9       | MODERATE:MODERATE |
| Alipsatici 2020 | 0.3188  | [-0.4274; 1.0650] | 12.9       | MODERATE:HIGH     |
| An 2020         | 2.2640  | [ 1.4084; 3.1197] | 12.0       | MODERATE:MODERATE |
| Broderick 2019  | 0.0347  | [-0.6810; 0.7504] | 13.2       | LOW:LOW           |
| Kim & Kang 2018 | 0.8451  | [ 0.0520; 1.6381] | 12.5       | MODERATE:MODERATE |
| Kim & Kim 2018a | 1.0860  | [ 0.1989; 1.9731] | 11.8       | MODERATE:MODERATE |
| Krzisnik 2021   | -0.3841 | [-1.2291; 0.4609] | 12.1       | LOW:LOW           |
| Munari 2018     | 0.4607  | [-0.5714; 1.4927] | 10.6       | LOW:HIGH          |

Number of studies: k = 8

Number of observations: o = 248

|                      | SMD    | 95%-CI            | t    | p-value |
|----------------------|--------|-------------------|------|---------|
| Random effects model | 0.6393 | [-0.0164; 1.2950] | 2.31 | 0.0545  |

Quantifying heterogeneity:

$\tau^2 = 0.4754$  [0.0937; 2.4389];  $\tau = 0.6895$  [0.3060; 1.5617]

$I^2 = 71.2\%$  [40.5%; 86.0%];  $H = 1.86$  [1.30; 2.68]

Quantifying residual heterogeneity:

$\tau^2 = 0.3413$ ;  $\tau = 0.5842$ ;  $I^2 = 66.7\%$  [13.5%; 87.2%];  $H = 1.73$  [1.08; 2.80]

Test of heterogeneity:

| Q     | d.f. | p-value |
|-------|------|---------|
| 24.28 | 7    | 0.0010  |

Results for subgroups (random effects model):

|                               | k     | SMD     | 95%-CI            | $\tau^2$ | $\tau$ | Q     |
|-------------------------------|-------|---------|-------------------|----------|--------|-------|
| Intensity = LOW:LOW           | 2     | -0.1637 | [-2.8208; 2.4934] | 0.3413   | 0.5842 | 0.55  |
| Intensity = MODERATE:MODERATE | 4     | 1.1431  | [-0.0334; 2.3197] | 0.3413   | 0.5842 | 11.48 |
| Intensity = LOW:HIGH          | 1     | 0.4607  | [-1.0809; 2.0023] | 0.3413   | 0.5842 | 0.00  |
| Intensity = MODERATE:HIGH     | 1     | 0.3188  | [-1.0480; 1.6856] | 0.3413   | 0.5842 | 0.00  |
|                               | $I^2$ |         |                   |          |        |       |
| Intensity = LOW:LOW           | 0.0%  |         |                   |          |        |       |
| Intensity = MODERATE:MODERATE | 73.9% |         |                   |          |        |       |
| Intensity = LOW:HIGH          | --    |         |                   |          |        |       |
| Intensity = MODERATE:HIGH     | --    |         |                   |          |        |       |

Test for subgroup differences (random effects model):

|                | Q     | d.f. | p-value |
|----------------|-------|------|---------|
| Between groups | 9.66  | 3    | 0.0217  |
| Within groups  | 12.03 | 4    | 0.0172  |

Details on meta-analytical method:

- Inverse variance method
- Sidik-Jonkman estimator for  $\tau^2$   
(assuming common  $\tau^2$  in subgroups)

- Q-Profile method for confidence interval of  $\tau^2$  and  $\tau$
- Hartung-Knapp adjustment for random effects model ( $df = 7$ )
- Hedges'  $g$  (bias corrected standardised mean difference; using exact formulae)

## 1.2.1.2 Amount

|                 | SMD     | 95%-CI            | %W(random) | amount.mins.delta.f |
|-----------------|---------|-------------------|------------|---------------------|
| Ada 2013        | 0.5730  | [ 0.0837; 1.0622] | 14.9       | Higher              |
| Alipsatici 2020 | 0.3188  | [-0.4274; 1.0650] | 12.9       | Equal               |
| An 2020         | 2.2640  | [ 1.4084; 3.1197] | 12.0       | Equal               |
| Broderick 2019  | 0.0347  | [-0.6810; 0.7504] | 13.2       | Equal               |
| Kim & Kang 2018 | 0.8451  | [ 0.0520; 1.6381] | 12.5       | Equal               |
| Kim & Kim 2018a | 1.0860  | [ 0.1989; 1.9731] | 11.8       | Equal               |
| Krzisnik 2021   | -0.3841 | [-1.2291; 0.4609] | 12.1       | Equal               |
| Munari 2018     | 0.4607  | [-0.5714; 1.4927] | 10.6       | Equal               |

Number of studies: k = 8

Number of observations: o = 248

|                      | SMD    | 95%-CI            | t    | p-value |
|----------------------|--------|-------------------|------|---------|
| Random effects model | 0.6393 | [-0.0164; 1.2950] | 2.31 | 0.0545  |

Quantifying heterogeneity:

$\tau^2 = 0.4754$  [0.0937; 2.4389];  $\tau = 0.6895$  [0.3060; 1.5617]

$I^2 = 71.2\%$  [40.5%; 86.0%];  $H = 1.86$  [1.30; 2.68]

Quantifying residual heterogeneity:

$\tau^2 = 0.5539$ ;  $\tau = 0.7442$ ;  $I^2 = 75.3\%$  [47.6%; 88.3%];  $H = 2.01$  [1.38; 2.93]

Test of heterogeneity:

| Q     | d.f. | p-value |
|-------|------|---------|
| 24.28 | 7    | 0.0010  |

Results for subgroups (random effects model):

|                              | k     | SMD    | 95%-CI            | $\tau^2$ | $\tau$ | Q     |
|------------------------------|-------|--------|-------------------|----------|--------|-------|
| amount.mins.delta.f = Equal  | 7     | 0.6521 | [-0.1420; 1.4461] | 0.5539   | 0.7442 | 24.26 |
| amount.mins.delta.f = Higher | 1     | 0.5730 | [-0.9656; 2.1115] | 0.5539   | 0.7442 | 0.00  |
|                              | $I^2$ |        |                   |          |        |       |
| amount.mins.delta.f = Equal  | 75.3% |        |                   |          |        |       |
| amount.mins.delta.f = Higher | --    |        |                   |          |        |       |

Test for subgroup differences (random effects model):

|                | Q     | d.f. | p-value |
|----------------|-------|------|---------|
| Between groups | 0.01  | 1    | 0.9258  |
| Within groups  | 24.26 | 6    | 0.0005  |

Details on meta-analytical method:

- Inverse variance method
- Sidik-Jonkman estimator for  $\tau^2$   
(assuming common  $\tau^2$  in subgroups)
- Q-Profile method for confidence interval of  $\tau^2$  and  $\tau$
- Hartung-Knapp adjustment for random effects model (df = 7)
- Hedges' g (bias corrected standardised mean difference; using exact formulae)

## 1.2.1.3 Dosage

Mixed-Effects Model (k = 8; tau<sup>2</sup> estimator: SJ)

tau<sup>2</sup> (estimated amount of residual heterogeneity): 0.5377 (SE = 0.3125)  
 tau (square root of estimated tau<sup>2</sup> value): 0.7333  
 I<sup>2</sup> (residual heterogeneity / unaccounted variability): 78.71%  
 H<sup>2</sup> (unaccounted variability / sampling variability): 4.70  
 R<sup>2</sup> (amount of heterogeneity accounted for): 0.00%

Test for Residual Heterogeneity:  
 QE(df = 6) = 23.7011, p-val = 0.0006

Test of Moderators (coefficient 2):  
 F(df1 = 1, df2 = 6) = 0.1895, p-val = 0.6786

Model Results:

|         | estimate | se     | tval    | df | pval   | ci.lb   | ci.ub  |
|---------|----------|--------|---------|----|--------|---------|--------|
| intrcpt | 0.7272   | 0.3565 | 2.0397  | 6  | 0.0875 | -0.1452 | 1.5996 |
| Dosage  | -0.0060  | 0.0138 | -0.4353 | 6  | 0.6786 | -0.0397 | 0.0277 |

---

Signif. codes: 0 '\*\*\*' 0.001 '\*\*' 0.01 '\*' 0.05 '.' 0.1 ' ' 1

## 1.2.2 Walking Speed

### 1.2.2.1 Intensity

|                     | SMD     | 95%-CI            | %W(random) | Intensity         |
|---------------------|---------|-------------------|------------|-------------------|
| Ada 2013            | 0.3827  | [-0.1009; 0.8663] | 12.7       | MODERATE:MODERATE |
| Alipsatici 2020     | 0.6910  | [-0.0749; 1.4569] | 8.9        | MODERATE:HIGH     |
| An 2020             | 1.0238  | [ 0.3243; 1.7232] | 9.7        | MODERATE:MODERATE |
| Broderick 2019      | 0.0449  | [-0.6708; 0.7607] | 9.5        | LOW:LOW           |
| Druzicki 2018       | 1.1273  | [ 0.3494; 1.9052] | 8.7        | LOW:LOW           |
| Kim & Kang 2018     | 0.9783  | [ 0.1727; 1.7838] | 8.4        | MODERATE:MODERATE |
| Kim & Kim 2018a     | 0.9646  | [ 0.0916; 1.8376] | 7.7        | MODERATE:MODERATE |
| Kim & Kim 2018b     | 1.5920  | [ 0.6922; 2.4918] | 7.4        | LOW:LOW           |
| Krzisnik 2021       | -0.0819 | [-0.9180; 0.7543] | 8.1        | LOW:LOW           |
| Munari 2018         | 0.5922  | [-0.4512; 1.6356] | 6.2        | LOW:HIGH          |
| Park & Chung 2018i  | 1.4671  | [ 0.4270; 2.5072] | 6.2        | LOW:LOW           |
| Park & Chung 2018ii | 0.9262  | [-0.0637; 1.9160] | 6.6        | LOW:LOW           |

Number of studies: k = 12

Number of observations: o = 341

|                      | SMD    | 95%-CI           | t    | p-value |
|----------------------|--------|------------------|------|---------|
| Random effects model | 0.7682 | [0.4460; 1.0905] | 5.25 | 0.0003  |

Quantifying heterogeneity:

$\tau^2 = 0.1499$  [0.0000; 0.5726];  $\tau = 0.3871$  [0.0000; 0.7567]

$I^2 = 35.7\%$  [0.0%; 67.5%];  $H = 1.25$  [1.00; 1.76]

Quantifying residual heterogeneity:

$\tau^2 = 0.2031$ ;  $\tau = 0.4507$ ;  $I^2 = 53.0\%$  [0.1%; 77.9%];  $H = 1.46$  [1.00; 2.13]

Test of heterogeneity:

Q d.f. p-value  
17.11 11 0.1046

Results for subgroups (random effects model):

|                               | k     | SMD    | 95%-CI            | $\tau^2$ | $\tau$ | Q     |
|-------------------------------|-------|--------|-------------------|----------|--------|-------|
| Intensity = LOW:LOW           | 6     | 0.7959 | [ 0.0405; 1.5514] | 0.2031   | 0.4507 | 13.74 |
| Intensity = MODERATE:MODERATE | 4     | 0.7988 | [ 0.2778; 1.3198] | 0.2031   | 0.4507 | 3.29  |
| Intensity = LOW:HIGH          | 1     | 0.5922 | [-0.7749; 1.9593] | 0.2031   | 0.4507 | 0.00  |
| Intensity = MODERATE:HIGH     | 1     | 0.6910 | [-0.4781; 1.8602] | 0.2031   | 0.4507 | 0.00  |
|                               | $I^2$ |        |                   |          |        |       |
| Intensity = LOW:LOW           | 63.6% |        |                   |          |        |       |
| Intensity = MODERATE:MODERATE | 8.7%  |        |                   |          |        |       |
| Intensity = LOW:HIGH          | --    |        |                   |          |        |       |
| Intensity = MODERATE:HIGH     | --    |        |                   |          |        |       |

Test for subgroup differences (random effects model):

|                | Q     | d.f. | p-value |
|----------------|-------|------|---------|
| Between groups | 0.11  | 3    | 0.9906  |
| Within groups  | 17.03 | 8    | 0.0298  |

Details on meta-analytical method:

- Inverse variance method



- Sidik-Jonkman estimator for  $\tau^2$   
(assuming common  $\tau^2$  in subgroups)
- Q-Profile method for confidence interval of  $\tau^2$  and  $\tau$
- Hartung-Knapp adjustment for random effects model ( $df = 11$ )
- Hedges'  $g$  (bias corrected standardised mean difference; using exact formulae)

## 1.2.2.2 Amount

|                     | SMD     | 95%-CI            | %W(random) | amount.mins.delta.f |
|---------------------|---------|-------------------|------------|---------------------|
| Ada 2013            | 0.3827  | [-0.1009; 0.8663] | 12.7       | Higher              |
| Alipsatici 2020     | 0.6910  | [-0.0749; 1.4569] | 8.9        | Equal               |
| An 2020             | 1.0238  | [ 0.3243; 1.7232] | 9.7        | Equal               |
| Broderick 2019      | 0.0449  | [-0.6708; 0.7607] | 9.5        | Equal               |
| Druzicki 2018       | 1.1273  | [ 0.3494; 1.9052] | 8.7        | Equal               |
| Kim & Kang 2018     | 0.9783  | [ 0.1727; 1.7838] | 8.4        | Equal               |
| Kim & Kim 2018a     | 0.9646  | [ 0.0916; 1.8376] | 7.7        | Equal               |
| Kim & Kim 2018b     | 1.5920  | [ 0.6922; 2.4918] | 7.4        | Equal               |
| Krzisnik 2021       | -0.0819 | [-0.9180; 0.7543] | 8.1        | Equal               |
| Munari 2018         | 0.5922  | [-0.4512; 1.6356] | 6.2        | Equal               |
| Park & Chung 2018i  | 1.4671  | [ 0.4270; 2.5072] | 6.2        | Equal               |
| Park & Chung 2018ii | 0.9262  | [-0.0637; 1.9160] | 6.6        | Equal               |

Number of studies: k = 12

Number of observations: o = 341

|                      | SMD    | 95%-CI           | t    | p-value |
|----------------------|--------|------------------|------|---------|
| Random effects model | 0.7682 | [0.4460; 1.0905] | 5.25 | 0.0003  |

Quantifying heterogeneity:

$\tau^2 = 0.1499$  [0.0000; 0.5726];  $\tau = 0.3871$  [0.0000; 0.7567]

$I^2 = 35.7\%$  [0.0%; 67.5%];  $H = 1.25$  [1.00; 1.76]

Quantifying residual heterogeneity:

$\tau^2 = 0.1508$ ;  $\tau = 0.3883$ ;  $I^2 = 32.4\%$  [0.0%; 66.8%];  $H = 1.22$  [1.00; 1.73]

Test of heterogeneity:

Q d.f. p-value  
17.11 11 0.1046

Results for subgroups (random effects model):

|                              | k     | SMD    | 95%-CI            | $\tau^2$ | $\tau$ | Q     |
|------------------------------|-------|--------|-------------------|----------|--------|-------|
| amount.mins.delta.f = Equal  | 11    | 0.8244 | [ 0.4755; 1.1734] | 0.1508   | 0.3883 | 14.79 |
| amount.mins.delta.f = Higher | 1     | 0.3827 | [-0.5190; 1.2844] | 0.1508   | 0.3883 | 0.00  |
|                              |       | $I^2$  |                   |          |        |       |
| amount.mins.delta.f = Equal  | 32.4% |        |                   |          |        |       |
| amount.mins.delta.f = Higher | --    |        |                   |          |        |       |

Test for subgroup differences (random effects model):

|                | Q     | d.f. | p-value |
|----------------|-------|------|---------|
| Between groups | 0.83  | 1    | 0.3634  |
| Within groups  | 14.79 | 10   | 0.1398  |

Details on meta-analytical method:

- Inverse variance method
- Sidik-Jonkman estimator for  $\tau^2$   
(assuming common  $\tau^2$  in subgroups)
- Q-Profile method for confidence interval of  $\tau^2$  and  $\tau$
- Hartung-Knapp adjustment for random effects model (df = 11)
- Hedges' g (bias corrected standardised mean difference; using exact formulae)

## 1.2.2.3 Dosage

Mixed-Effects Model (k = 12; tau<sup>2</sup> estimator: SJ)

tau<sup>2</sup> (estimated amount of residual heterogeneity): 0.1556 (SE = 0.0854)  
 tau (square root of estimated tau<sup>2</sup> value): 0.3944  
 I<sup>2</sup> (residual heterogeneity / unaccounted variability): 49.31%  
 H<sup>2</sup> (unaccounted variability / sampling variability): 1.97  
 R<sup>2</sup> (amount of heterogeneity accounted for): 0.00%

Test for Residual Heterogeneity:  
 QE(df = 10) = 15.8672, p-val = 0.1035

Test of Moderators (coefficient 2):  
 F(df1 = 1, df2 = 10) = 0.6067, p-val = 0.4541

Model Results:

|         | estimate | se     | tval    | df | pval   | ci.lb   | ci.ub  |     |
|---------|----------|--------|---------|----|--------|---------|--------|-----|
| intrcpt | 0.8318   | 0.1695 | 4.9067  | 10 | 0.0006 | 0.4541  | 1.2096 | *** |
| Dosage  | -0.0064  | 0.0082 | -0.7789 | 10 | 0.4541 | -0.0248 | 0.0119 |     |

---

Signif. codes: 0 '\*\*\*' 0.001 '\*\*' 0.01 '\*' 0.05 '.' 0.1 ' ' 1

## References

- Ada, L., Dean, C.M., Lindley, R., 2013. Randomized trial of treadmill training to improve walking in community-dwelling people after stroke: the AMBULATE trial. *Int J Stroke* 8, 436-444. doi:10.1111/j.1747-4949.2012.00934.x
- Aguiar, L.T., Nadeau, S., Britto, R.R., Teixeira-Salmela, L.F., Martins, J.C., Samora, G.A.R., da Silva Junior, J.A., Faria, C., 2020. Effects of aerobic training on physical activity in people with stroke: A randomized controlled trial. *NeuroRehabilitation* 46, 391-401. doi:10.3233/NRE-193013
- Alipsatici, C., Alaca, N., Canbora, M., 2020. Comparison of the effects of treadmill trainings on walking and balance functions by increasing the speed and incline in chronic patients with stroke. *Turk J Neurol* 26, 316-321. doi:10.4274/tnd.2020.48921
- An, B., Woo, Y., Park, K., Kim, S., 2020. Effects of insole on the less affected side during execution of treadmill walking training on gait ability in chronic stroke patients: A preliminary study. *Restor Neurol Neurosci* 38, 375-384. doi:10.3233/RNN-201040
- Brauer, S.G., Kuys, S.S., Ada, L., Paratz, J.D., 2022. Improving Physical Activity after stroke via Treadmill training (IMPACT) and self-management: A randomized trial. *Int J Stroke* 17, 1137-1144. doi:10.1177/17474930221078121
- Broderick, P., Horgan, F., Blake, C., Ehrensberger, M., Simpson, D., Monaghan, K., 2019. Mirror therapy and treadmill training for patients with chronic stroke: a pilot randomized controlled trial. *Top Stroke Rehabil* 26, 163-172. doi:10.1080/10749357.2018.1556504
- Combs-Miller, S.A., Kalpathi Parameswaran, A., Colburn, D., Ertel, T., Harmeyer, A., Tucker, L., Schmid, A.A., 2014. Body weight-supported treadmill training vs. overground walking training for persons with chronic stroke: a pilot randomized controlled trial. *Clin Rehabil* 28, 873-884. doi:10.1177/0269215514520773
- Druzicki, M., Przysada, G., Guzik, A., Brzozowska-Magon, A., Kolodziej, K., Wolan-Nieroda, A., Majewska, J., Kwolek, A., 2018. The Efficacy of Gait Training Using a Body Weight Support Treadmill and Visual Biofeedback in Patients with Subacute Stroke: A Randomized Controlled Trial. *Biomed Res Int* 2018, 3812602. doi:10.1155/2018/3812602
- Eich, H.J., Mach, H., Werner, C., Hesse, S., 2004. Aerobic treadmill plus Bobath walking training improves walking in subacute stroke: A randomized controlled trial. *Clin Rehabil* 18, 640-651. doi:10.1191/0269215504cr779oa
- Gama, G.L., Celestino, M.L., Barela, J.A., Forrester, L., Whittall, J., Barela, A.M., 2017. Effects of Gait Training With Body Weight Support on a Treadmill Versus Overground in Individuals With Stroke. *Arch Phys Med Rehabil* 98, 738-745. doi:10.1016/j.apmr.2016.11.022
- Hornby, T.G., Henderson, C.E., Plawewski, A., Lucas, E., Lotter, J., Holthus, M., Brazg, G., Fahey, M., Woodward, J., Ardestani, M., Roth, E.J., 2019. Contributions of Stepping Intensity and Variability to Mobility in Individuals Poststroke. *Stroke* 50, 2492-2499. doi:10.1161/STROKEAHA.119.026254
- Kang, H.K., Kim, Y., Chung, Y., Hwang, S., 2012. Effects of treadmill training with optic flow on balance and gait in individuals following stroke: randomized controlled trials. *Clin Rehabil* 26, 246-255. doi:10.1177/0269215511419383
- Kim, B.R., Kang, T.W., 2018. The effects of proprioceptive neuromuscular facilitation lower-leg taping and treadmill training on mobility in patients with stroke. *Int J Rehabil Res* 41, 343-348. doi:10.1097/MRR.0000000000000309
- Kim, C.H., Kim, Y.N., 2018a. Effects of proprioceptive neuromuscular facilitation and treadmill training on the balance and walking ability of stroke patients. *J Korean Phys Ther* 30, 79-83. doi:10.18857/jkpt.2018.30.3.79
- Kim, J., Yim, J., 2017. Effects of an Exercise Protocol for Improving Handgrip Strength and Walking Speed on Cognitive Function in Patients with Chronic Stroke. *Med Sci Monit* 23, 5402-5409. doi:10.12659/msm.904723
- Kim, K.J., Kim, K.H., 2018b. Progressive treadmill cognitive dual-task gait training on the gait ability in patients with chronic stroke. *J Exerc Rehabil* 14, 821-828. doi:10.12965/jer.1836370.185
- Kržišnik, M., Horvat Rauter, B., Bizovčar, N., 2021. Effects of virtual reality-based treadmill training on the balance and gait ability in patients after stroke. *Hrvatska revija za rehabilitacijska istraživanja* 57, 92-102. doi:10.31299/hrri.57.2.6
- Laufer, Y., Dickstein, R., Chefez, Y., Marcovitz, E., 2001. The effect of treadmill training on the ambulation of stroke survivors in the early stages of rehabilitation: A randomized study. *J Rehab Res and Dev* 38, 69-78.
- Mackay-Lyons, M., McDonald, A., Matheson, J., Eskes, G., Klus, M.A., 2013. Dual effects of body-weight supported treadmill training on cardiovascular fitness and walking ability early after stroke: a randomized controlled trial. *Neurorehabil Neural Repair* 27, 644-653. doi:10.1177/1545968313484809
- Macko, R.F., Ivey, F.M., Forrester, L.W., Hanley, D., Sorkin, J.D., Katzel, L.I., Silver, K.H., Goldberg, A.P., 2005. Treadmill exercise rehabilitation improves ambulatory function and cardiovascular fitness in patients with chronic stroke: a randomized, controlled trial. *Stroke* 36, 2206-2211. doi:10.1161/01.STR.0000181076.91805.89
- Munari, D., Pedrinolla, A., Smania, N., Picelli, A., Gandolfi, M., Saltuari, L., Schena, F., 2018. High-intensity treadmill training improves gait ability, VO2peak and cost of walking in stroke survivors: preliminary results of a pilot randomized controlled trial. *Eur J Phys Rehabil Med* 54, 408-418. doi:10.23736/S1973-9087.16.04224-6
- Nave, A.H., Rackoll, T., Grittner, U., Blasing, H., Gorsler, A., Nabavi, D.G., Audebert, H.J., Klostermann, F., Muller-Werdan, U., Steinhagen-Thiessen, E., Meisel, A., Endres, M., Hesse, S., Ebinger, M., Floel, A., 2019. Physical Fitness Training in Patients with Subacute Stroke (PHYS-STROKE): multicentre, randomised controlled, endpoint blinded trial. *BMJ* 366, l5101. doi:10.1136/bmj.l5101
- Park, I.M., Lee, Y.S., Moon, B.M., Sim, S.M., 2013. A comparison of the effects of overground gait training and treadmill gait training according to stroke patients' gait velocity. *J Phys Ther Sci* 25, 379-382. doi:10.1589/jpts.25.379
- Park, J., Park, S.Y., Kim, Y.W., Woo, Y., 2015. Comparison between treadmill training with rhythmic auditory stimulation and ground walking with rhythmic auditory stimulation on gait ability in chronic stroke patients: A pilot study. *NeuroRehabilitation* 37, 193-202. doi:10.3233/NRE-151252
- Park, J.H., Chung, Y.J., 2018. Comparison of Aquatic Treadmill and Anti-Gravity Treadmill Gait Training to Improve Balance and Gait Abilities in Stroke Patients. *The Journal of Korean Physical Therapy* 30, 67-72. doi:10.18857/jkpt.2018.30.2.67
- Pohl, M., Ritschel, C., Ruckriem, S., 2002. Speed-dependent treadmill training in ambulatory hemiparetic stroke patients A randomized controlled trial. *Stroke* 33, 553-558. doi:10.1161/hs0202.102365
