# Supplementary material for: Challenge Level Contributes to the Efficacy of Treadmill Interventions after Stroke: A Systematic Review and Meta-Analysis
Source: MDPI journal article supplement (doi:10.3390/brainsci13121729), 2023-12-18
Supplement: s1 [file s1]

**Supplementary Table S1.** Intervention Amount.

| Author                                      | Experimental Intervention                                    |                                                    |                          |                                                  |                          | Comparison Intervention                           |                                                    |                          |                                                   |                     |
|---------------------------------------------|--------------------------------------------------------------|----------------------------------------------------|--------------------------|--------------------------------------------------|--------------------------|---------------------------------------------------|----------------------------------------------------|--------------------------|---------------------------------------------------|---------------------|
|                                             | Duration (mins)                                              | Frequency (per week)                               | Programme length (weeks) | Work Duration (mins)                             | Total Amount (mins)      | Duration (mins)                                   | Frequency (per week)                               | Programme length (weeks) | Work Duration (mins)                              | Total Amount (mins) |
| TT versus other physiotherapy interventions |                                                              |                                                    |                          |                                                  |                          |                                                   |                                                    |                          |                                                   |                     |
| Aguiar et al. (2020) [1]                    | 40                                                           | 3                                                  | 12                       | 40                                               | 1440                     | 40                                                | 3                                                  | 12                       | 40                                                | 1440                |
| Brauer et al. (2022) [2]                    | TT & self management or conv GT 30                           | TT:3<br>Conv GT:2                                  | 8                        | NR                                               | 1200                     | 30                                                | 5                                                  | 8                        | NR                                                | 1200                |
| Combs-Miller et al. (2014) [3]              | 30                                                           | 5                                                  | 2                        | 30                                               | 300                      | 30                                                | 5                                                  | 2                        | 30                                                | 300                 |
| Eich et al. (2004) [4]                      | 60                                                           | 5                                                  | 6                        | NR                                               | 1800                     | 60                                                | 5                                                  | 6                        | NR                                                | 1800                |
| Gama et al. (2017) [5]                      | 45                                                           | 3                                                  | 6                        | NR                                               | 810                      | 45                                                | 3                                                  | 6                        | NR                                                | 810                 |
| Hornby et al. (2019) [6]                    | EXP 1&2: 60                                                  | EXP 1&2: 3 to 5 (mean 3.375)                       | EXP 1&2: 8               | EXP 1: 33<br>EXP 2: 34                           | EXP 1: 891<br>EXP 2: 918 | 60                                                | 3 to 5                                             | 8                        | 37                                                | 999                 |
| Kang et al. (2012) [7]                      | EXP 1&2: 30                                                  | EXP 1&2: 3<br>Plus CVT:5                           | EXP 1&2: 4               | EXP 1 & 2: 30                                    | EXP 1&2: 360             | 30                                                | 3                                                  | 4                        | NR                                                | 360                 |
| Kim & Yim (2017) [8]                        | TT: 20<br>Hand grip strength (HGS): 15<br>Conv rehab: 2 x 60 | HGS+TT:3<br>Conv rehab:5                           | 6                        | TT: 20                                           | 4230                     | 2 x 60                                            | 5                                                  | 6                        | NR                                                | 3600                |
| Laufer et al. (2001) [9]                    | TT = 4 mins week 1, 6 mins week 2, 8 mins week 3             | 5                                                  | 3                        | TT = 4 mins week 1, 6 mins week 2, 8 mins week 3 | 90                       | OGT = 4 mins week 1, 6 mins week 2, 8 mins week 3 | 5                                                  | 3                        | OGT = 4 mins week 1, 6 mins week 2, 8 mins week 3 | 90                  |
| MacKay-Lyons et al. (2013) [10]             | 60                                                           | 5 for 1 <sup>st</sup> 6w, 3 for 2 <sup>nd</sup> 6w | 12                       | NR                                               | 2880                     | 60                                                | 5 for 1 <sup>st</sup> 6w, 3 for 2 <sup>nd</sup> 6w | 12                       | NR                                                | 2880                |
| Macko et al. (2005) [11]                    | 40                                                           | 3                                                  | 26                       | NR                                               | 3120                     | 40                                                | 3                                                  | 26                       | 40                                                | 3120                |
| Nave et al. (2019) [12]                     | 50                                                           | 5                                                  | 4                        | TT: 21<br>Other: NR                              | 1000                     | 50                                                | 5                                                  | 4                        | Relaxation 24<br>Other NR                         | 1000                |
| Park et al. (2013) [13]                     | 30                                                           | 10 (twice per day for 5 days)                      | EXP 1&2: 1               | NR                                               | 300                      | 30                                                | 10 (twice per day for 5 days)                      | 1                        | NR                                                | 300                 |

|                                  |                                                                     |                                   |    |                                                |                |                                                                   |                          |                            |                                                |                                 |
|----------------------------------|---------------------------------------------------------------------|-----------------------------------|----|------------------------------------------------|----------------|-------------------------------------------------------------------|--------------------------|----------------------------|------------------------------------------------|---------------------------------|
| Park et al.<br>(2015) [14]       | 30 TT (Conv rehab NR)                                               | 5                                 | 3  | NR                                             | 450            | 30 OGT (Conv rehab NR)                                            | 5                        | 3                          | NR                                             | 450                             |
| Pohl et al.<br>(2002) [15]       | EXP 1: TT 30 +<br>Conv PT 45<br>EXP 2: TT 30 +<br>Conv PT 45        | TT: 3<br>Conv PT : 2              | 4  | NR                                             | EXP 1&2: 720   | Conv GT:45<br>Conv PT:45                                          | Conv GT: 3<br>Conv PT: 2 | 4                          | NR                                             | 900                             |
| TT versus another type of TT     |                                                                     |                                   |    |                                                |                |                                                                   |                          |                            |                                                |                                 |
| Ada et al.<br>(2013) [16]        | 30                                                                  | 3                                 | 16 | 30                                             | 1440           | COMP 1: 30<br>COMP 2: NA                                          | COMP 1: 3<br>COMP 2: NA  | COMP 1: 8<br>COMP 2:<br>NA | COMP 1: 30                                     | COMP 1:<br>720<br>COMP 2:<br>NA |
| Alipsatici et al.<br>(2020) [17] | Total 75<br>(TT 30, e-stim 15,<br>conv rehab 30)                    | 3                                 | 8  | TT: 30                                         | 1800           | 75<br>(TT 30, e-stim 15,<br>conv rehab 30)                        | 3                        | 8                          | TT: 30                                         | 1800                            |
| An et al.<br>(2020) [18]         | 30                                                                  | 5                                 | 4  | 30                                             | 600            | 30                                                                | 5                        | 4                          | 30                                             | 600                             |
| Broderick et al.<br>(2019) [19]  | 30                                                                  | 3                                 | 4  | 30                                             | 360            | 30                                                                | 3                        | 4                          | 30                                             | 360                             |
| Družbicki et al.<br>(2018) [20]  | TT: 30<br>Conv rehab: 120<br>mins weekdays +<br>45 mins Saturdays   | TT: 5<br>Conv: 6                  | 3  | TT: 30                                         | 2385           | TT: 30<br>Conv rehab: 120<br>mins weekdays +<br>45 mins Saturdays | 5                        | 3                          | TT: 30                                         | 2385                            |
| Kim & Kang<br>(2018) [21]        | 50                                                                  | 5                                 | 6  | 30                                             | 900            | 50                                                                | 5                        | 6                          | 30                                             | 900                             |
| Kim & Kim<br>(2018a) [22]        | 40 (PNF warmup 5, PNF<br>15 mins, TT 15<br>mins, PNF<br>cooldown 5) | 5                                 | 6  | NR                                             | 1200           | 40 (PNF warmup<br>5, treadmill 30,<br>PNF cooldown 5)             | 5                        | 6                          | NR                                             | 1200                            |
| Kim & Kim<br>(2018b) [23]        | 30                                                                  | 5                                 | 4  | NR                                             | 600            | 30                                                                | 5                        | 4                          | NR                                             | 600                             |
| Kržišnik et al.<br>(2021) [24]   | Conv rehab: 90<br>TT: 15.5 (13mins<br>for 2w + 18mins<br>for 2w)    | 5                                 | 4  | TT: 15.5 (13mins<br>for 2w + 18mins<br>for 2w) | 2110           | Conv rehab: 90<br>TT: 15.5                                        | 5                        | 4                          | TT: 15.5 (13mins<br>for 2w + 18mins<br>for 2w) | 2110                            |
| Munari et al.<br>(2018) [25]     | 55                                                                  | 3                                 | 12 | 55                                             | 1980           | 55                                                                | 3                        | 12                         | 55                                             | 1980                            |
| Park & Chung<br>(2018) [26]      | EXP 1 + 2: TT:<br>30<br>Conv PT: 30                                 | EXP 1 + 2:<br>TT: 3<br>Conv PT: 5 | 4  | NR                                             | EXP 1 + 2: 960 | 30                                                                | TT: 3<br>Conv PT: 5      | 4                          | NR                                             | 960                             |

Abbreviations: COMP, comparison; Conv, conventional; e-stim, electrical stimulation; EXP, experimental; GT, gait training; OGT, overground gait training; PNF, proprioceptive neuromuscular facilitation; PT, physiotherapy; NR, not reported; TT, treadmill training.

## References

1. Aguiar, L.T.; Nadeau, S.; Britto, R.R.; Teixeira-Salmela, L.F.; Martins, J.C.; Samora, G.A.R.; da Silva Junior, J.A.; Faria, C. Effects of aerobic training on physical activity in people with stroke: A randomized controlled trial. *NeuroRehabilitation* **2020**, *46*, 391-401; doi: 10.3233/NRE-193013.
2. Brauer, S.G.; Kuys, S.S.; Ada, L.; Paratz, J.D. Improving Physical Activity after stroke via Treadmill training (IMPACT) and self-management: A randomized trial. *Int J Stroke* **2022**, *17*, 1137-44; doi: 10.1177/17474930221078121.
3. Combs-Miller, S.A.; Kalpathi Parameswaran, A.; Colburn, D.; Ertel, T.; Harmeyer, A.; Tucker, L.; Schmid, A.A. Body weight-supported treadmill training vs. overground walking training for persons with chronic stroke: a pilot randomized controlled trial. *Clin Rehabil* **2014**, *28*, 873-84; doi: 10.1177/0269215514520773.
4. Eich, H.J.; Mach, H.; Werner, C.; Hesse, S. Aerobic treadmill plus Bobath walking training improves walking in subacute stroke: A randomized controlled trial. *Clin Rehabil* **2004**, *18*, 640-51; doi: 10.1191/0269215504cr779oa.
5. Gama, G.L.; Celestino, M.L.; Barela, J.A.; Forrester, L.; Whittall, J.; Barela, A.M. Effects of Gait Training With Body Weight Support on a Treadmill Versus Overground in Individuals With Stroke. *Arch Phys Med Rehabil* **2017**, *98*, 738-45; doi: 10.1016/j.apmr.2016.11.022.
6. Hornby, T.G.; Henderson, C.E.; Plawecki, A.; Lucas, E.; Lotter, J.; Holthus, M.; Brazg, G.; Fahey, M.; Woodward, J.; Ardestani, M.; Roth, E.J. Contributions of Stepping Intensity and Variability to Mobility in Individuals Poststroke. *Stroke* **2019**, *50*, 2492-99; doi: 10.1161/STROKEAHA.119.026254.
7. Kang, H.K.; Kim, Y.; Chung, Y.; Hwang, S. Effects of treadmill training with optic flow on balance and gait in individuals following stroke: randomized controlled trials. *Clin Rehabil* **2012**, *26*, 246-55; doi: 10.1177/0269215511419383.
8. Kim, J.; Yim, J. Effects of an Exercise Protocol for Improving Handgrip Strength and Walking Speed on Cognitive Function in Patients with Chronic Stroke. *Med Sci Monit* **2017**, *23*, 5402-09; doi: 10.12659/msm.904723.
9. Laufer, Y.; Dickstein, R.; Chefez, Y.; Marcovitz, E. The effect of treadmill training on the ambulation of stroke survivors in the early stages of rehabilitation: A randomized study. *J Rehab Res and Dev* **2001**, *38*, 69-78; doi:
10. Mackay-Lyons, M.; McDonald, A.; Matheson, J.; Eskes, G.; Klus, M.A. Dual effects of body-weight supported treadmill training on cardiovascular fitness and walking ability early after stroke: a randomized controlled trial. *Neurorehabil Neural Repair* **2013**, *27*, 644-53; doi: 10.1177/1545968313484809.
11. Macko, R.F.; Ivey, F.M.; Forrester, L.W.; Hanley, D.; Sorkin, J.D.; Katzel, L.I.; Silver, K.H.; Goldberg, A.P. Treadmill exercise rehabilitation improves ambulatory function and cardiovascular fitness in patients with chronic stroke: a randomized, controlled trial. *Stroke* **2005**, *36*, 2206-11; doi: 10.1161/01.STR.0000181076.91805.89.
12. Nave, A.H.; Rackoll, T.; Grittner, U.; Blasing, H.; Gorsler, A.; Nabavi, D.G.; Audebert, H.J.; Klostermann, F.; Muller-Werdan, U.; Steinhagen-Thiessen, E.; Meisel, A.; Endres, M.; Hesse, S.; Ebinger, M.; Floel, A. Physical Fitness Training in Patients with Subacute Stroke (PHYS-STROKE): multicentre, randomised controlled, endpoint blinded trial. *BMJ* **2019**, *366*, l5101; doi: 10.1136/bmj.l5101.
13. Park, I.M.; Lee, Y.S.; Moon, B.M.; Sim, S.M. A comparison of the effects of overground gait training and treadmill gait training according to stroke patients' gait velocity. *J Phys Ther Sci* **2013**, *25*, 379-82; doi: 10.1589/jpts.25.379.
14. Park, J.; Park, S.Y.; Kim, Y.W.; Woo, Y. Comparison between treadmill training with rhythmic auditory stimulation and ground walking with rhythmic auditory stimulation on gait ability in chronic stroke patients: A pilot study. *NeuroRehabilitation* **2015**, *37*, 193-202; doi: 10.3233/NRE-151252.
15. Pohl, M.; Ritschel, C.; Ruckriem, S. Speed-dependent treadmill training in ambulatory hemiparetic stroke patients A randomized controlled trial. *Stroke* **2002**, *33*, 553-58; doi: 10.1161/hs0202.102365.
16. Ada, L.; Dean, C.M.; Lindley, R. Randomized trial of treadmill training to improve walking in community-dwelling people after stroke: the AMBULATE trial. *Int J Stroke* **2013**, *8*, 436-44; doi: 10.1111/j.1747-4949.2012.00934.x.

17. Alipsatici, C.; Alaca, N.; Canbora, M. Comparison of the effects of treadmill trainings on walking and balance functions by increasing the speed and incline in chronic patients with stroke. *Turk J Neurol* **2020**, *26*, 316-21; doi: 10.4274/tnd.2020.48921.
18. An, B.; Woo, Y.; Park, K.; Kim, S. Effects of insole on the less affected side during execution of treadmill walking training on gait ability in chronic stroke patients: A preliminary study. *Restor Neurol Neurosci* **2020**, *38*, 375-84; doi: 10.3233/RNN-201040.
19. Broderick, P.; Horgan, F.; Blake, C.; Ehrensberger, M.; Simpson, D.; Monaghan, K. Mirror therapy and treadmill training for patients with chronic stroke: a pilot randomized controlled trial. *Top Stroke Rehabil* **2019**, *26*, 163-72; doi: 10.1080/10749357.2018.1556504.
20. Druzicki, M.; Przysada, G.; Guzik, A.; Brzozowska-Magon, A.; Kolodziej, K.; Wolan-Nieroda, A.; Majewska, J.; Kwolek, A. The Efficacy of Gait Training Using a Body Weight Support Treadmill and Visual Biofeedback in Patients with Subacute Stroke: A Randomized Controlled Trial. *Biomed Res Int* **2018**, *2018*, 3812602; doi: 10.1155/2018/3812602.
21. Kim, B.R.; Kang, T.W. The effects of proprioceptive neuromuscular facilitation lower-leg taping and treadmill training on mobility in patients with stroke. *Int J Rehabil Res* **2018**, *41*, 343-48; doi: 10.1097/MRR.0000000000000309.
22. Kim, C.-H.; Kim, Y.-N. Effects of proprioceptive neuromuscular facilitation and treadmill training on the balance and walking ability of stroke patients. *J Korean Phys Ther* **2018a**, *30*, 79-83; doi: 10.18857/jkpt.2018.30.3.79.
23. Kim, K.J.; Kim, K.H. Progressive treadmill cognitive dual-task gait training on the gait ability in patients with chronic stroke. *J Exerc Rehabil* **2018b**, *14*, 821-28; doi: 10.12965/jer.1836370.185.
24. Kržišnik, M.; Horvat Rauter, B.; Bizovčar, N. Effects of virtual reality-based treadmill training on the balance and gait ability in patients after stroke. *Hrvatska revija za rehabilitacijska istraživanja* **2021**, *57*, 92-102; doi: 10.31299/hrri.57.2.6.
25. Munari, D.; Pedrinolla, A.; Smania, N.; Picelli, A.; Gandolfi, M.; Saltuari, L.; Schena, F. High-intensity treadmill training improves gait ability, VO<sub>2</sub>peak and cost of walking in stroke survivors: preliminary results of a pilot randomized controlled trial. *Eur J Phys Rehabil Med* **2018**, *54*, 408-18; doi: 10.23736/S1973-9087.16.04224-6.
26. Park, J.H.; Chung, Y.J. Comparison of Aquatic Treadmill and Anti-Gravity Treadmill Gait Training to Improve Balance and Gait Abilities in Stroke Patients. *The Journal of Korean Physical Therapy* **2018**, *30*, 67-72; doi: 10.18857/jkpt.2018.30.2.67.
