# Supplementary material for: Challenge Level Contributes to the Efficacy of Treadmill Interventions after Stroke: A Systematic Review and Meta-Analysis
Source: MDPI journal article supplement (doi:10.3390/brainsci13121729), 2023-12-18
Supplement: s1 [file s1]

## Supplementary File S1: Scopus Database Search Strategy

Adapted from: Mehrholz, J., Thomas, S., & Elsner, B. (2017). Treadmill training and body weight support for walking after stroke. *Cochrane Database Syst Rev*, 8, CD002840.

<https://doi.org/10.1002/14651858.CD002840.pub4>

- #1. (Stroke or poststroke or "post-stroke" or cerebrovasc\* or "brain vasc\*" or "cerebral vasc\*" or cva\* or apoplex\* or SAH)
- #2. (brain\* or cerebr\* or cerebell\* or intracran\* or intracerebral) W/5 (ischaemi\* or ischemi\* or infarct\* or thrombo\* or emboli\* or occlu\*)
- #3. (brain\* or cerebr\* or cerebell\* or intracerebral or intracranial or subarachnoid) W/5 (haemorrhage\* or hemorrhage\* or haematoma\* or hematoma\* or bleed\*)
- #4. hemipleg\* or hemipar\* or paresis or paretic
- #5. (gait or walk\* or locomot\*) W/2 (impair\* or problem\* or deficit\* or compromise)
- #6. #1 OR #2 OR #3 OR #4 OR #5
- #7. "Body weight" or "weight bearing" or weightbear\*
- #8. Treadmill\* or "tread mill\*" or "running wheel\*" or "running machine"
- #9. (walk or walking or exercise) W/5 (machine\* or device\*)
- #10. (walking or gait or locomot\* or ambulat\*) W/5 (train\* or "re train\*" or retrain\*)
- #11. (Weight or bodyweight or "body weight") W/5 (support\* or suspen\* or relief)
- #12. (Walk or walking or ambulat\* or locomot\* or gait or overhead) W/5 (support\*)
- #13. harness\*
- #14. #7 OR #8 OR #9 OR #10 OR #11 OR #12 OR #13
- #15. walk\* or gait\* or ambulat\* or mobil\* or locomot\* or stride
- #16. random\* W/5 (trial\* or stud\*)
- #17. control\* W/5 (trial\* or stud\*)
- #18. (singl\* or doubl\* or tripl\* or trebl\*) W/5 (blind\* or mask\*)
- #19. placebo\* or sham\* or cross-over or "cross over" or "trial\*" or RCT
- #20. (clinical\* W/5 trial\*)
- #21. (control\* or treatment\* or experiment\* or intervention) W/5 (group\* or subject\* or patient\*)
- #22. ("quasi random\*" or "pseudo random\*")
- #23. (control or experiment\* or conservative) W/5 (treatment or therap\* or procedure or manage\*)
- #24. assign\* or allocat\*
- #25. #16 OR #17 OR #18 OR #19 OR #20 OR #21 OR #22 OR #23 OR #24
- #26. #6 AND #14 AND #15 AND #25
